# Supplementary material
Source: PubMed Central journal article supplement (PMC4702739)
Supplement: JCM.02068-15_zjm999094687so1.pdf [file JCM.02068-15_zjm999094687so1.pdf]

**Table S1. Test of specificity of qPCR system used in this study against a panel of 77 bacteria . The replicas were done twice.**

|                                           | <i>M. faucium</i> | <i>Mycoplasma</i> spp. |
|-------------------------------------------|-------------------|------------------------|
| <i>Achromobacter xylosoxidans</i>         | negative          | negative               |
| <i>Acinetobacter baumannii</i>            | negative          | negative               |
| <i>Arcanobacterium haemolyticum</i>       | negative          | negative               |
| <i>Bacteroides fragilis</i>               | negative          | negative               |
| <i>Bordetella bronchoseptica</i>          | negative          | negative               |
| <i>Bordetella holmesii</i>                | negative          | negative               |
| <i>Burkholderia cepacia</i>               | negative          | negative               |
| <i>Capnocytophaga canimorsus</i>          | negative          | negative               |
| <i>Chlamydia pneumoniae</i>               | negative          | negative               |
| <i>Corynebacterium diphtheriae</i>        | negative          | negative               |
| <i>Corynebacterium tuberculostearicum</i> | negative          | negative               |
| <i>Enterobacter cloacae</i>               | negative          | negative               |
| <i>Finnegoldia magna</i>                  | negative          | negative               |
| <i>Fusobacterium necrophorum</i>          | negative          | negative               |
| <i>Fusobacterium nucleatum</i>            | negative          | negative               |
| <i>Haemophilus agni</i>                   | negative          | negative               |
| <i>Haemophilus aphrophilus</i>            | negative          | negative               |
| <i>Haemophilus influenzae</i>             | negative          | negative               |
| <i>Haemophilus parahaemolyticus</i>       | negative          | negative               |
| <i>Haemophilus parainfluenzae</i>         | negative          | negative               |
| <i>Haemophilus parasuis</i>               | negative          | negative               |
| <i>Klebsiella pneumoniae</i>              | negative          | negative               |
| <i>Lactobacillus gasseri</i>              | negative          | negative               |
| <i>Legionella pneumophila</i>             | negative          | negative               |
| <i>Legionella taurinensis</i>             | negative          | negative               |
| <i>Legionella rubrilucens</i>             | negative          | negative               |
| <i>Moraxella catarrhalis</i>              | negative          | negative               |
| <i>Mycoplasma adleri</i>                  | negative          | <b>Positive</b>        |
| <i>Mycoplasma agalactiae</i>              | negative          | <b>Positive</b>        |
| <i>Mycoplasma arginini</i>                | negative          | <b>Positive</b>        |
| <i>Mycoplasma arthritis</i>               | negative          | <b>Positive</b>        |
| <i>Mycoplasma auris</i>                   | negative          | <b>Positive</b>        |
| <i>Mycoplasma bovirhinis</i>              | negative          | <b>Positive</b>        |
| <i>Mycoplasma buccale</i>                 | negative          | <b>Positive</b>        |
| <i>Mycoplasma capricolum</i>              | negative          | <b>Positive</b>        |
| <i>Mycoplasma cottewii</i>                | negative          | <b>Positive</b>        |
| <b><i>Mycoplasma faucium</i></b>          | <b>Positive</b>   | <b>Positive</b>        |
| <i>Mycoplasma fermentans</i>              | negative          | <b>Positive</b>        |
| <i>Mycoplasma gallisepticum</i>           | negative          | <b>Positive</b>        |

|                                         |          |                 |
|-----------------------------------------|----------|-----------------|
| <i>Mycoplasma genitalium</i>            | negative | <b>Positive</b> |
| <i>Mycoplasma hominis</i>               | negative | <b>Positive</b> |
| <i>Mycoplasma lagogenitalium</i>        | negative | <b>Positive</b> |
| <i>Mycoplasma meleagridis</i>           | negative | <b>Positive</b> |
| <i>Mycoplasma mycoides spp capri</i>    | negative | <b>Positive</b> |
| <i>Mycoplasma mycoides spp mycoides</i> | negative | <b>Positive</b> |
| <i>Mycoplasma neurolyticum</i>          | negative | <b>Positive</b> |
| <i>Mycoplasma orale</i>                 | negative | <b>Positive</b> |
| <i>Mycoplasma primatum</i>              | negative | negative        |
| <i>Mycoplasma sturni</i>                | negative | negative        |
| <i>Mycoplasma yeatsii</i>               | negative | negative        |
| <i>Neisseria meningitidis</i>           | negative | negative        |
| <i>Neisseria gonorrhoeae</i>            | negative | negative        |
| <i>Prevotella denticola</i>             | negative | negative        |
| <i>Prevotella melaninogenica</i>        | negative | negative        |
| <i>Propionibacterium acnes</i>          | negative | negative        |
| <i>Pseudomonas aeruginosa</i>           | negative | negative        |
| <i>Rothia mucilaginosa</i>              | negative | negative        |
| <i>Serratia marcesens</i>               | negative | negative        |
| <i>Staphylococcus aureus</i>            | negative | negative        |
| <i>Staphylococcus epidermidis</i>       | negative | negative        |
| <i>Staphylococcus hominis</i>           | negative | negative        |
| <i>Stenotrophomonas maltophilia</i>     | negative | negative        |
| <i>Streptococcus gordonii</i>           | negative | negative        |
| <i>Streptococcus salivarius</i>         | negative | negative        |
| <i>Streptococcus agalactiae</i>         | negative | negative        |
| <i>Streptococcus anginosus</i>          | negative | negative        |
| <i>Streptococcus constellatus</i>       | negative | negative        |
| <i>Streptococcus gallolyticus</i>       | negative | negative        |
| <i>Streptococcus intermedius</i>        | negative | negative        |
| <i>Streptococcus mitis</i>              | negative | negative        |
| <i>Streptococcus mutans</i>             | negative | negative        |
| <i>Streptococcus oralis</i>             | negative | negative        |
| <i>Streptococcus pneumoniae</i>         | negative | negative        |
| <i>Streptococcus pseudopneumoniae</i>   | negative | negative        |
| <i>Streptococcus pyogenes</i>           | negative | negative        |
| <i>Streptococcus sanguinis</i>          | negative | negative        |
| <i>Veillonella parvula</i>              | negative | negative        |
