# Supplementary material
Source: PubMed Central journal article supplement (PMC4702739)
Supplement: JCM.02068-15_zjm999094687so2.pdf [file JCM.02068-15_zjm999094687so2.pdf]

**Table S2. Test of sensitivity of qPCR system used in this study.**

|                     | <i>Mycoplasma</i> spp. | <i>M. faucium</i>    |
|---------------------|------------------------|----------------------|
| DNA copies/ $\mu$ l | Cycle threshold (Ct)   | Cycle threshold (Ct) |
| 1,E+09              | 8                      | 7                    |
| 1,E+08              | 12                     | 11                   |
| 1,E+07              | 15                     | 15                   |
| 1,E+06              | 18                     | 18                   |
| 1,E+05              | 22                     | 22                   |
| 1,E+04              | 25                     | 25                   |
| 1,E+03              | 28                     | 28                   |
| 1,E+02              | 31                     | 31                   |
| 1,E+01              | 34                     | 35                   |
| 1,E+00              | negative               | negative             |
