# Supplementary material
Source: PubMed Central journal article supplement (PMC4702739)

**Figure S1. Representative results of standard curves of qPCR for the detection of *Mycoplasma* spp. (a) and *M. faucium* (b).**

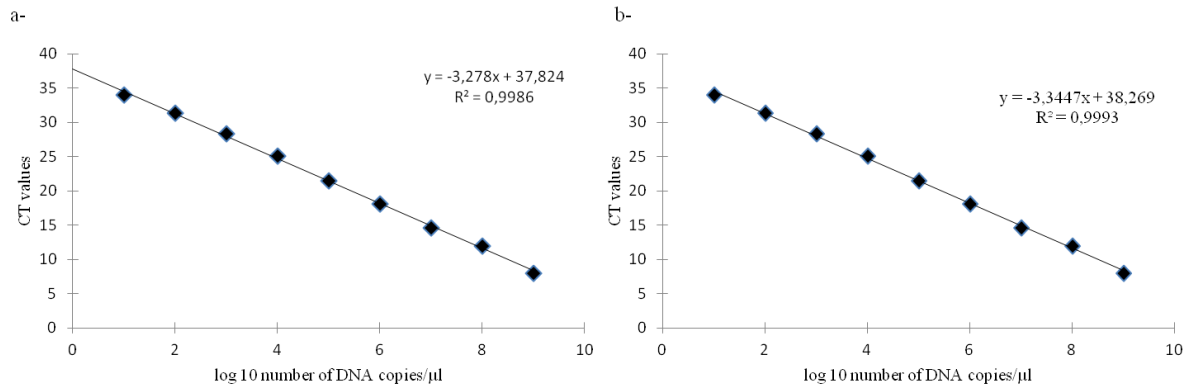

Supplement: JCM.02068-15_zjm999094687so3.pdf [file JCM.02068-15_zjm999094687so3.pdf]
